# Supplementary material for: Notch pathway mutants do not equivalently perturb mouse embryonic retinal development
Source: PLoS Genet. 2023 Sep 26;19(9):e1010928. doi: 10.1371/journal.pgen.1010928 (PMC10522021; doi:10.1371/journal.pgen.1010928)
Supplement: S5 Table — (XLSX) [file pgen.1010928.s005.xlsx]

## Sheet: Fig 3O
Pax2+ cells in ONH
Control	Rx Rbpj	Rx dnM	Rx TKO	Chx Rbpj	Chx dnM	Chx TKO
114	158	162	70	88	115	217
136	94	159	109	177	199	248
143	107	151	112	78	132	223
83	185			69		248
152	166			146
151	109
70
83
132
92
79
133

## Sheet: Fig 3P
Pax2+Pax6+ cells at ONH boundaries
Control	RxRbpj	RxdnM	RxTKO	ChxRbpj	ChxdnM	ChxTKO
15	8	4	0	4	13	10
17	7	8	2	16	9	11
4	11	4	1	10	5	9
12	4		2	6	10	6
9	2				6
10
4
11
4
12
7

## Sheet: Fig 5O
Ph3 CELL COUNTS	GENOTYPE
	Chx10 RBPJ F/+	sec/replicate	sec/replicate	Average # Positive cells/ sec	Retinal Area sec1	Retinal Area sec2	Average Area Traces/ sec	cells per 10000 um2
	7.2 sl13 se1 and sl16 se1	37	48	42.5	183548	98149.4	140849	3.01742
	24-1 sl3 se2 and se3	44	48	46	171131	181240	176186	2.61088
	31-1 sl17 se2 and se3	45	44	44.5	227607	228616	228112	1.9508
	31-2 sl7 se2 and s2 other eye	47	49	48	187541	211927	199734	2.4032
	35.11 sl4 se2 and sl5 se2	43	45	44	123541	146390	134966	3.26009
	65.2 sl21 se1 and se3	45	53	49	156697	163912	160304	3.05668
	80.9 sl1 se1 and sl2 se2	46	46	46	148097	144093	146095	3.14864
	RaxCre Rbpj
	7.4 sl15 se2 and sl20 se2	20	25	22.5	109257	125965	117611	1.91309
	26.4 sl15 se2 and other eye	23	20	21.5	181446	153587	167516	1.28346
	83.4 sl3 se2 and other eye	25	26	25.5	166383	157114	161748	1.57652
	RaxCre dnM
	24-2 sl14 se2 and sl7 se3	45	29	37	153862	157613	155738	2.37579
	81-1 sl2 se2 and se3	44	42	43	233035	223183	228109	1.88506
	81-2 sl12 se2 and se3	29	29	29	197945	138434	168190	1.72425
	RaxCreHes1ff Hes3-5Ko
	9.4 sl9 se1 and se3	55	46	50.5	143188	150933	147060	3.43396
	9.8 sl10 se1 and se3	51	43	47	160957	171638	166298	2.82626
	10.1 sl4 se1 and se2	49	45	47	212891	219922	216406	2.17184
	Chx10 RBPJ f/f
	7-1 sl21 se3 and sl13 se2	38	31	34.5	221054	223757	222406	1.55122
	7.6 sl32 se1 and sl37 se2	39	26	32.5	214151	198275	206213	1.57604
	7-11 sl16 se3 and sl20 se2	46	37	41.5	190025	188545	189285	2.19246
	Chx10 dnM
	31-3 sl5 se2 and sl16 se1	62	40	51	200881	223311	212096	2.40457
	31-5 sl15 se2 and se3	37	54	45.5	203517	221012	212264	2.14355
	74-6 sl4 se2 and se3	45	40	42.5	161679	177941	169810	2.5028
	Chx10 Hes1ff Hes3-5KO
	35.7 sl10 se2 and se3	43	42	42.5	188204	145896	167050	2.54415
	35.7 sl 11 se2 and se3	29	18	23.5	145821	172549	159185	1.47627
	35.6 sl3 se1 and sl4 se1	51	57	54	156745	166756	161750	3.33847
	65-3 sl13 se2 se3	50	36	43	229472	234899	232186	1.85197
	68-3 sl11 se1and se2	22	26	24	138803	148631	143717	1.66995

## Sheet: Fig 5P
cPARP CELL COUNTS	GENOTYPE
	Controls	sec/REPLICATE	sec/REPLICATE	Average # Positive cells/sec	Retinal Area sec1	Retinal Area sec2	Average Traces/ sec	cells per 10000 um2
	7.2 sl13 se1 and sl16 se1	6	8	7	183548	98149.4	140849	0.496987
	24-1 sl3 se2 & se3	6	8	7	171131	181240	176186	0.397309
	31-2 sl7 se2 other eye & sl7 se2	8	9	8.5	187541	211927	199734	0.425566
	31-4 sl12 se2 & se3	8	3	5.5	208709	201124	204916	0.268402
	65.2 sl9 se1 and 2	5	4	4.5	155095	156292	155694	0.289029
	11-6 sl3 se1 and sl4 se3	4	5	4.5	166404	170920	168662	0.266806
	10.2 sl11 se1 and sl12 se1	2	2	2	168189	155358	161774	0.12363
	RaxCre Rbpj
	7.4 sl15 se2 and sl20 se2	60	72	66	109257	125965	117611	5.61172
	26.4 sl15 se2 and other eye	69	30	49.5	181446	153587	167516	2.95493
	83.4 sl3 se2 and other eye	45	51	48	166383	157114	161748	2.96757
	RaxCre dnM
	24-2 sl14 se2 and sl7 se3	18	21	19.5	153862	157613	155738	1.25211
	81-1 sl2 se2 and se3	27	24	25.5	233035	223183	228109	1.11789
	81-2 sl12 se2 and se3	18	17	17.5	197945	138434	168190	1.04049
	RaxCreHes1ff Hes3-5Ko
	9-4 sl6 se1 and se3	10	15	12.5	160452	185447	172950	0.722754
	9.8 sl7 se1 and se2	19	11	15	164432	161198	162815	0.921291
	11-5 sl11 se1 and se2	22	22	22	192983	203353	198168	1.11017
	11-2 sl9 se2 and sl18 se2	17	16	16.5	157085	189075	173080	0.953316
	Chx10 RBPJ f/f
	7-11 sl16 se3 and sl20 se2	9	8	8.5	190025	188545	189285	0.449058
	7-1 sl11 se1 and sl13 se2	7	6	6.5	208525	223757	216141	0.30073
	7.6 sl32 se1 and sl20 se2	8	7	7.5	214151	257530	235840	0.318012
	Chx10 dnM
	31-3 sl5 se2 and sl16 se1	11	8	9.5	228807	223311	226059	0.420244
	31-5 sl15 se2 and se3	10	8	9	203517	221012	212264	0.423999
	74-6 sl4 se2 and 3	6	8	7	161679	177941	169810	0.412225
	Chx10 Hes1ff Hes3-5KO
	35.6 sl22 se2 and sl23 se2	12	7	9.5	147619	133138	140378	0.676742
	35-7 sl11 se2 and 3	5	7	6	145821	172549	159185	0.37692
	65-3 sl13 se2 and 3	7	8	7.5	229472	234899	232186	0.323018
	68-3 sl11se1 and se2	7	12	9.5	138803	148631	143717	0.661021

## Sheet: Fig 6V
E13 Atoh7	Replicate	Atoh7+ cells		Area Traces (um2)	cells per 10000 um2
Control	70.1	706		94850	74.4333
	65.2 sl11	547		82882	65.9974
	70.2 sl17se3	659		111432	59.1392
	65.7 sl16se1	542		110561	49.0227
	65.7sl16se3	530		108858	48.6874
	31.4 sl13	569		118275	48.1082
RaxRbpjff	7.4 sl12se2	384		94364.8	40.6931
	83.4sl1se2	417		67529	61.7512
	87.1 sl3se2	433		97247.4	44.5256
rax dmM	81.1 sl8se2	741		143891	51.4973
	81.2 sl13 se2	583		105984	55.0083
	81.2 sl13 se3	502		90655	55.3748
Rx H1-3-5	9.4sl10se3	271		58107	46.6381
	9.8 sl12se3	484		75744	63.8995
	11.5	643		136502	47.1055
	11.7 sl9se1	396		71946	55.0413
	11.7 sl9se2	769		127773	60.1849
	60.2 sl14se1	385		62195	61.9021
Chx10Rbpjff	7.1 sl25se3	490		110203	44.4634
	7.11 sl17 se2	413		106748	38.6892
	7.6 sl18se2	519		138797	37.3927
chx dnM	74.6 sl7se2	748		115359	64.8411
	31.3 sl2se3	906		175793	51.5379
	71.8 sl1se2	632		98981.9	63.8501
	71.8 sl6 se3	857		119169	71.9147
Chx10 H1-3-5	35.7	339		84246	40.2393
	65.3 sl11	416		106757	38.967
	80.9sl15se3	391		84425	46.3133

## Sheet: Figs 6W and 6X
		Otx2 retina	Atoh7+	Double +		AREA um2		Otx2+ per area		Dbl+ per area
Control
65.7sl16se1		318	542	241		110561		28.7624		21.7979
70.1		298	706	227		94850		31.418		23.9325
65.2		222	547	135		82882		26.7851		16.2882
31.4 sl13		462	569	280		118275		39.0615		23.6736
70.2		304	659	169		111432		27.2812		15.1662
65.7 sl16sec3		370	530	212		108858		33.9892		19.4749
Rx Rbpj
7.4 sl12se2		682	384	156		94364.8		72.2727		16.5316
83.4sl1se2		512	417	206		67529		75.8193		30.5054
87.1 sl3se2		465	433	78		97247.4		47.8162		8.02078
Rx dnM
81.1 sl8se2		553	741	195		143891		38.4319		13.5519
81.2 sl13 se2		326	583	112		105984		30.7594		10.5676
81.2 sl13 se3		324	502	121		90655		35.7399		13.3473
Rx TKO
9.8 sl12se3		34	484	20		75744		4.4888		2.64047
11.5		150	643	92		136502		10.9888		6.73983
11.7 sl9se1		87	396	20		71946		12.0924		2.77986
11.7 sl9se2		255	769	170		127773		19.9573		13.3048
60.2 sl14se1		74	385	40		62195		11.8981		6.43139
60.2		35	462	27		26567		13.1742		10.163
Chx Rbpj
7.1 sl25se3		291	490	173		110203		26.4058		15.6983
7.11 sl17 se2		236	413	61		106748		22.1081		5.71439
7.6 sl18se2		364	519	116		138797		26.2254		8.35753
Chx dnM
74.6 sl7se2		463	748	243		115359		40.1356		21.0647
31.3 sl2se3		573	906	252		175793		32.5952		14.335
71.8 sl1se2		379	632	185		98981.9		38.2898		18.6903
71.8 sl6 se3		478	857	213		119169		40.1111		17.8738
Chx TKO
35.7		111	339	58		84246		13.1757		6.8846
65.3 sl11		85	416	31		106757		7.96201		2.90379
80.9sl15se3		79	391	31		84425		9.35742		3.6719

## Sheet: Fig 6Y
	Replicate	Rbpms+		area traces (um2)		Cells per 10000 um2
Control	26.3 sl2se2	257		79861.9		32.1806
	65.2 sl19se3	227		76386.1		29.7175
	35.11 sl19se1	242		83281.6		29.058
	11.6 sl16	273		84510.2		32.3038
	24-1 sl7se2	375		101642		36.8943
	10.2 sl7se1	372		99196		37.5015
Rx Rbpj ff	83.4 sl7se2	288		97002.5		29.69
	83.4 sl14se1	210		85523		24.5548
	7.4 sl9 se2	282		59981.8		47.0142
Rx dnM	24-2 sl10se3	452		72023.3		62.7574
	81-2 sl3se3	594		90581.7		65.5762
	81.1 sl3se3	766		118188		64.812
	81.1 sl3se2	840		121893		68.913
Rx H triple	70.7 sl3	1124		96780.7		116.139
	9.8 sl15	885		94885.5		93.2703
	11.5	950		85084.3		111.654
Chx10 Rbpjff	7-6 sl34xe1	269		99907.4		26.9249
	7.3 sl17se2	284		117160		24.2404
	7.3 sl17sec3	222		102679		21.6208
	7.6 sl12se3	294		143506		20.4869
	31.5 sl13 se3	529		95360		55.474
Chx dnM	31-3 sl7se2	541		125140		43.2316
	74-6 l7se2	567		92058.6		61.5912
Chx H triple	35.7	470		71880.7		65.3861
	65.13	594		93367.5		63.6196
Chx H triple	65.13 sl11se3	416		70034		59.3997

## Sheet: Figs 6 Z and AA
E13.5 Crx Cell Count	Replicates	Cell counts	Area Traces (um2)	cells per 10000 um2
Controls	7.1	91	77561.8	11.7326
	26.3	95	79861.9	11.8955
	65.2	88	76386.1	11.5204
	31.4	112	93590.7	11.967
RaxCre; RbpjFF	7.4	511	59981.8	85.1924
	26.4 sl16 se2	631	79680	79.1918
	83.4	952	97002.5	98.1418
RaxCre; dnM	24.2 sl10 se3	233	60908.3	38.2542
	81.1	528	121893	43.3168
	81.2	353	90581.7	38.9703
Rax-Cre Hes1ff	8.1 sl9 se2	63	104993	6.00042
	8.2 sl20 se2	84	150958	5.56447
	8.3 sl8 se2	52	102947	5.05115
RaxCre; Hes1ff Hes3-5Ko	11.5	72	85084.3	8.4622
	70.7	80	96780.7	8.26611
	9.8	99	94885.5	10.4336
Chx10-Cre; RBPJ f/f	7.6	218	99907.4	21.8202
	7.1	115	86333.5	13.3204
	7.11	190	96366.5	19.7164
Chx10-Cre; dnM	71.8	210	95613	21.9635
	74.6	267	92058.6	29.0033
	31.5	254	95360	26.6359
Chx10-Cre; Hes1ff Hes3-5KO	65.13	67	93367.5	7.17594
	35.7	52	71880.7	7.23421
	63.5	58	81410.2	7.12442

## Sheet: Figure 7M
E13 Blimp1/Prdm1	Replicate	Positive Cells	Area Traces (um2)	cells per 10000 um2
Controls
	7.1 sl11 se3	141	81256.1	17.3525
	65.2 sl18 se1	129	82200.5	15.6933
	26.3 sl3 se2 plane 2	141	95249.7	14.8032
Rax-Cre Rbpjff
	7.4 sl16 se2	342	58233.1	58.7294
	26.4 (no ONH) sl5 se3	619	113963	54.316
	83-4 sl8 se3	561	61342.4	91.4538
Rax-Cre dnM
	24-2 sl12 se2	201	71473.1	28.1225
	81.1 sl15 se2	280	100778	27.7839
	81.2 sl17 se2	259	87040.3	29.7563
Rax-Cre Hes1ff
	82.3 sl5 se2	85	77304.8	10.9954
	8.1 sl10 se2	127	135807	9.35149
	8.2 sl13 se1	153	132290	11.5655
Rax-Cre; Hes1ff; Hes3-5+/-
	10.5 sl8 se2	69	87472	7.88824
	11.4 sl9 se2	49	68741.8	7.12813
	60-1 sl13 se2	55	79071	6.95577
Rax-Cre; Hes1ff; Hes3-5KO
	10.1 sl2 se3	68	135202	5.02951
	11.2 sl12 se2	50	104960	4.76371
	60-2 sl9 se2	31	65538.6	4.73004

## Sheet: Fig 7N
E13 Ptf1a	Replicate	Ptf1a+ cells	Area Traces (um2)	cells per 10000 um2
Controls
	7.1 sl14 se3	107	81256.1	13.1682
	26.3 sl3 s2 se3 plane2	123	95249.7	12.9134
	65.2 sl13 se2	102	93702.4	10.8855
Rax-Cre Rbpjff
	7.4 sl17 se2	0	71208.3	0
	26.4 (no ONH) sl4 se3	0	99166.4	0
	83-4 sl8 se3	0	61342.4	0
Rax-Cre dnM
	24-2 sl12 se2	43	71473.1	6.01625
	81.1 sl15 se2	65	100778	6.44984
	81.2 sl17 se2	78	87040.3	8.96136
Rax-Cre Hes1ff
	82.3 sl5 se2	71	77304.8	9.18442
	8.1 sl10 se2	89	135807	6.5534
	8.2 sl13 se1	117	132290	8.84422
Rax-Cre; Hes1ff; Hes3-5+/-
	10.5 sl9 se2	48	81743.7	5.87201
	11.4 sl4 se2	70	89762.8	7.79833
	60-1 sl se2	56	92505.2	6.05371
Rax-Cre; Hes1ff; Hes3-5KO
	10.1 sl2 se3	76	135202	5.62122
	11.2 sl12 se2	57	104960	5.43063
	60-2 sl7 se2	52	63764.9	8.15495

[truncated: 1 more sheets: S6Q Fig ]
